# Supplementary material for: Critical factors for levulinic acid production from starch-rich food waste: solvent effects, reaction pressure, and phase separation
Source: Royal Society of Chemistry journal article supplement (doi:10.1039/d1gc01948a), 2021-09-30
Supplement: d1gc01948a1.pdf [file d1gc01948a1.pdf]

## Supplementary Information

### **Critical factors for levulinic acid production from starch-rich food waste: Solvent effects, reaction pressure and phase separation**

Shanta Dutta <sup>a</sup>, Iris K.M. Yu <sup>a,b</sup>, Jiajun Fan <sup>c</sup>, James H. Clark <sup>c</sup>, and Daniel C.W. Tsang <sup>a,\*</sup>

<sup>a</sup> Department of Civil and Environmental Engineering, The Hong Kong Polytechnic University, 181 Chatham Road South, Hung Hom, Kowloon, Hong Kong, China.

<sup>b</sup> Department of Chemistry and Catalysis Research Institute, TU München, Lichtenbergstrasse 4, 85748 Garching, Germany.

<sup>c</sup> Green Chemistry Centre of Excellence, Department of Chemistry, University of York, York, YO10 5DD, UK.

\*Corresponding

author,

[dan.tsang@polyu.edu.hk](mailto:dan.tsang@polyu.edu.hk)

## List of Figures:

- Fig. S1.** Total product yields during the catalytic conversion of bread waste under different solvents at (a) at 130°C and (b) at 130°C and 150°C under GVL/H<sub>2</sub>O and IPA/H<sub>2</sub>O (Reaction conditions: 5 wt% substrate loading, 0.5 M H<sub>2</sub>SO<sub>4</sub>, 1-20 min, 1:1 solvent ratio).
- Fig. S2.** XRD pattern of untreated bread waste and solid residues collected after reaction under different solvents (Reaction conditions: 5 wt% substrate loading, 0.5 M H<sub>2</sub>SO<sub>4</sub>, 130°C, 20 min, 1:1 solvent ratio).
- Fig. S3.** Distribution of products in the aqueous phase and organic (GVL) phase during the catalytic conversion of bread waste in GVL/H<sub>2</sub>O biphasic medium (Reaction conditions: 5 wt% substrate loading, 0.5 M H<sub>2</sub>SO<sub>4</sub>, 30 wt% NaCl<sub>(aq)</sub> 150°C, 10-20 min, 1:1 solvent ratio).
- Fig. S4.** LA, FA, and HMF distribution in the organic phase and the aqueous phase, and partition coefficients obtained for the catalytic conversion of bread waste in IPA/H<sub>2</sub>O biphasic medium (Reaction conditions: 5 wt% substrate loading, 0.5 M H<sub>2</sub>SO<sub>4</sub>, 30 wt% NaCl<sub>(aq)</sub> 150°C, 20 min).

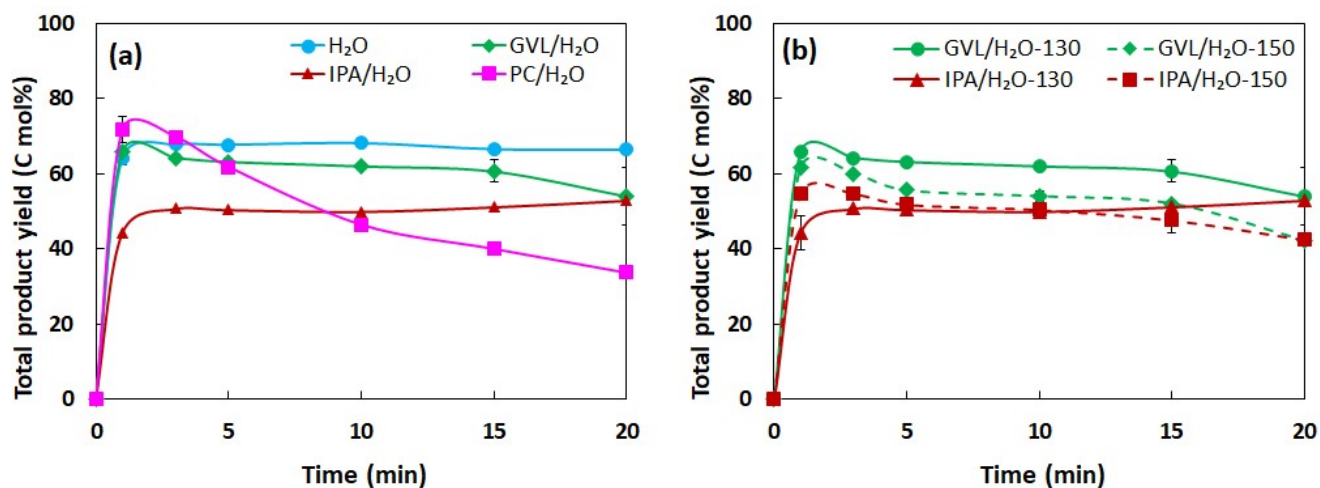

**Fig. S1.** Total product yields during the catalytic conversion of bread waste under different solvents at (a) at 130°C and (b) at 130°C and 150°C under GVL/H<sub>2</sub>O and IPA/H<sub>2</sub>O (Reaction conditions: 5 wt% substrate loading, 0.5 M H<sub>2</sub>SO<sub>4</sub>, 1-20 min, 1:1 solvent ratio).

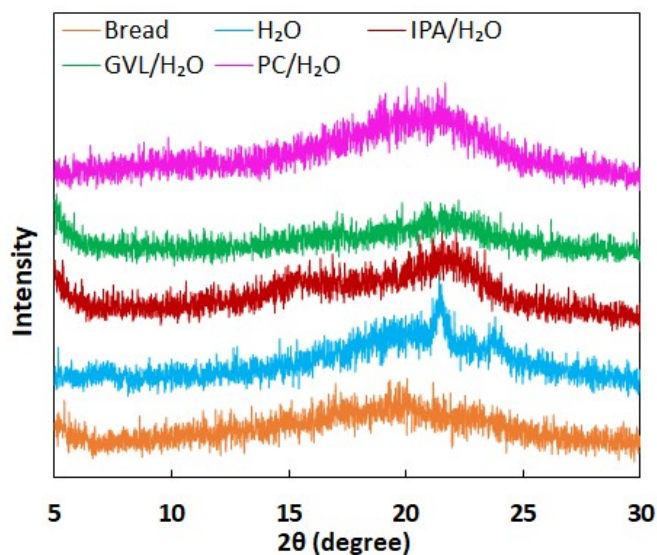

**Fig. S2.** XRD pattern of untreated bread waste and solid residues collected after reaction under different solvents (Reaction conditions: 5 wt% substrate loading, 0.5 M H<sub>2</sub>SO<sub>4</sub>, 130°C, 20 min, 1:1 solvent ratio).

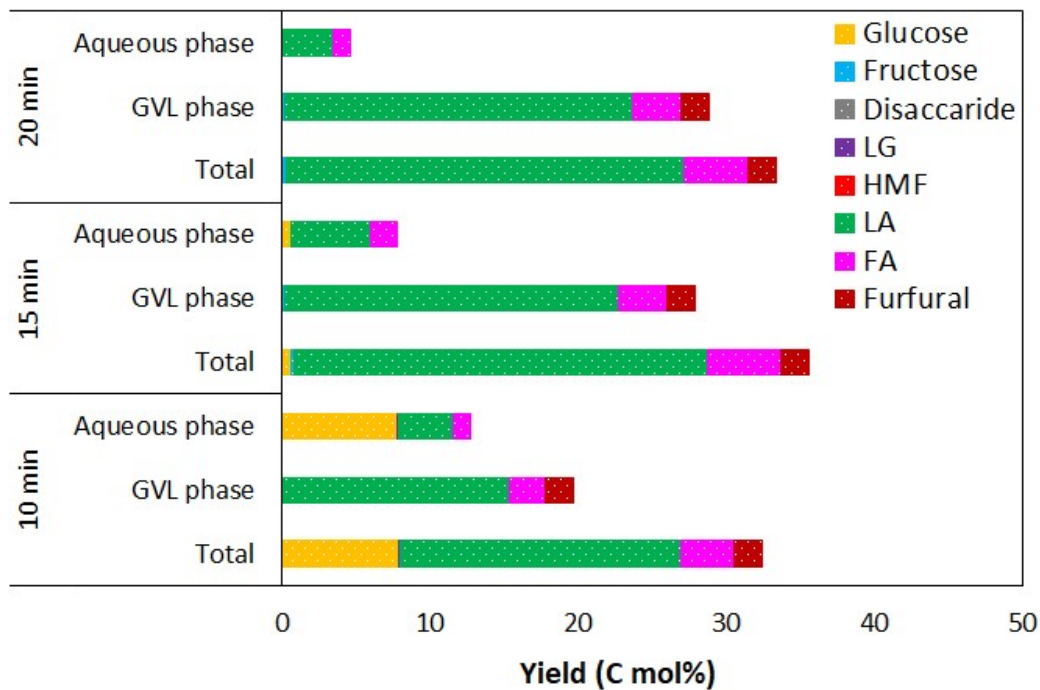

**Fig. S3.** Distribution of products in the aqueous phase and organic (GVL) phase during the catalytic conversion of bread waste in GVL/H<sub>2</sub>O biphasic medium (Reaction conditions: 5 wt% substrate loading, 0.5 M H<sub>2</sub>SO<sub>4</sub>, 30 wt% NaCl<sub>(aq)</sub> 150°C, 10-20 min, 1:1 solvent ratio).

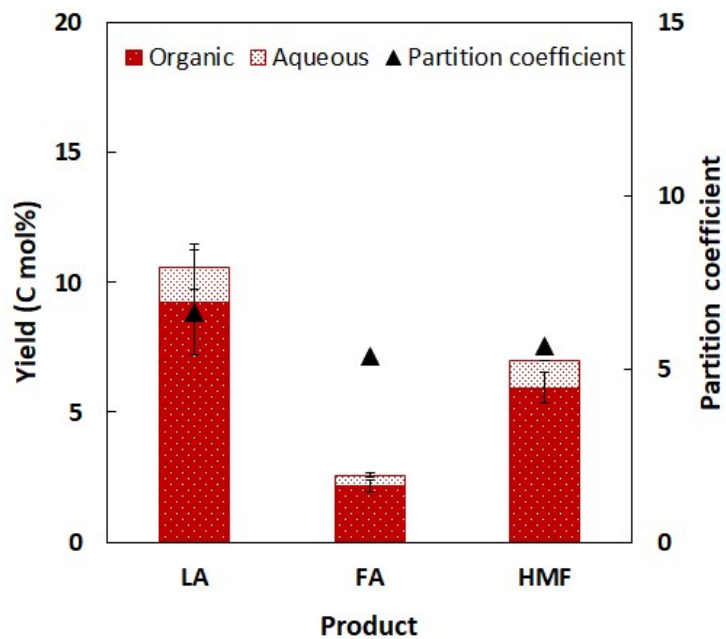

**Fig. S4.** LA, FA, and HMF distribution in the organic phase and the aqueous phase, and partition coefficients obtained for the catalytic conversion of bread waste in IPA/H<sub>2</sub>O biphasic medium (Reaction conditions: 5 wt% substrate loading, 0.5 M H<sub>2</sub>SO<sub>4</sub>, 30 wt% NaCl<sub>(aq)</sub> 150°C, 20 min).
